# Supplementary material for: Home-based record (HBR) ownership and use of HBR recording fields in selected Kenyan communities: Results from the Kenya Missed Opportunities for Vaccination Assessment
Source: PubMed Central journal article supplement (PMC6072064; doi:10.1371/journal.pone.0201538), 2018-08-02
Supplement: pone.0201538.s001.pdf [file pone.0201538.s001.pdf]

Selected home-based record related questions\* included in the Kenya Missed Opportunities for Vaccination Assessment exit interview questionnaire.

- Does your child have a vaccination card / health passport?  
**Response set:** Yes, and I have it with me  
Yes, but I do not have it with me  
No
- Have you ever lost a vaccination card / health passport for this child?  
**Response set:** Yes  
No
- Did you encounter difficulty getting it replaced?  
**Response set:** Yes  
No
- Could you tell me what purpose the vaccination card / health passport serves?  
**Response set:** To know what vaccines the child has had and which ones are missing  
Other, specify  
Don't Know / No Response
- During today's clinic visit, did the staff ask you for the child's vaccination card / health passport?  
**Response set:** Yes  
No
- Have you ever been asked to pay for a health card / passport for your child?  
**Response set:** Yes  
No
- What type of health facility asked you to pay? (asked only if response 'Yes' to question above)  
**Response set:** Yes  
No

\* Full questionnaire available from authors on request.
